# Supplementary material for: Micro- and mesoporous poly(Schiff-base)s constructed from different building blocks and their adsorption behaviors towards organic vapors and CO2gas
Source: Royal Society of Chemistry journal article supplement (doi:10.1039/c4ta04429k), 2014-10-08
Supplement: c4ta04429k1.pdf [file c4ta04429k1.pdf]

## Electronic Supplementary Information

### Micro- and mesoporous poly(schiff-base)s constructed from different building blocks and their adsorption behaviors of organic vapors and CO<sub>2</sub> gas

Guiyang Li, Biao Zhang, Jun Yan and Zhonggang Wang\*

#### Contents:

#### Experimental section:

**Table S1** Elemental analysis data of the poly(Schiff base) networks.

**Fig. S1.** FTIR spectra of the microporous poly(Schiff base) networks.

**Fig. S2.** TG curves of the four poly(Schiff base)s.

**Fig. S3.** Wide angle X-ray diffractions of the four microporous poly(Schiff base)s.

**Fig. S4.** Selectivities of CO<sub>2</sub> over CH<sub>4</sub> and N<sub>2</sub> for PSN-DA from initial slope calculations.

**Fig. S5.** Selectivity of CO<sub>2</sub> over CH<sub>4</sub> and N<sub>2</sub> for PSN-TAPB from initial slope calculations.

**Fig. S6.** Selectivities of CO<sub>2</sub> over CH<sub>4</sub> and N<sub>2</sub> for PSN-TAPA from initial slope calculations.

**Fig. S7.** Selectivities of CO<sub>2</sub> over CH<sub>4</sub> and N<sub>2</sub> for PSN-TAPM from initial slope calculations.

**Fig. S8.** PSN-DA Experimental pure component curves for CO<sub>2</sub>, CH<sub>4</sub> and N<sub>2</sub> at 273K, and the corresponding single-site Langmuir-Freundlich fits for CO<sub>2</sub>, CH<sub>4</sub> and N<sub>2</sub>.

**Fig. S9.** PSN-TAPB Experimental pure component curves for CO<sub>2</sub>, CH<sub>4</sub> and N<sub>2</sub> at 273K, and the corresponding single-site Langmuir-Freundlich fits for CO<sub>2</sub>, CH<sub>4</sub> and N<sub>2</sub>.

**Fig. S10.** PSN-TAPA Experimental pure component curves for CO<sub>2</sub>, CH<sub>4</sub> and N<sub>2</sub> at 273K, and the corresponding single-site Langmuir-Freundlich fits for CO<sub>2</sub>, CH<sub>4</sub> and N<sub>2</sub>.

**Fig. S11.** PSN-TAPM Experimental pure component curves for CO<sub>2</sub>, CH<sub>4</sub> and N<sub>2</sub> at 273K, and the corresponding single-site Langmuir-Freundlich fits for CO<sub>2</sub>, CH<sub>4</sub> and N<sub>2</sub>.

## Experimental section:

**Synthesis of 1,3,5,7-Tetrakis(4-formylphenyl)adamantane (TFPA).** TFPA were prepared according to the procedures described in the literature. 1,3,5,7-Tetraphenyladamantane (TPA) was prepared in reference to the procedure<sup>1a</sup> with some modifications. TFPA was synthesized following the similar method as described in the literature.<sup>1b</sup> Tetraphenyladamantane (3.80 g, 8.6 mmol, 1 eq.) and dichloromethane (150 mL) was added to a 250 mL three-necked round-bottomed flask with a magnetic stir-bar. Under a dried argon-flowing, the mixture was stirred rapidly and cooled to  $-10\text{ }^{\circ}\text{C}$  with an ice/salt bath. Titanium tetrachloride (19.0 mL, 172.4 mmol, 20 eq.) was then added slowly to the mixture and stirred at  $-10\text{ }^{\circ}\text{C}$  for 30 min.  $\alpha,\alpha$ -Dichloromethyl methylether (12.5 mL, 137.9 mmol, 16 eq.) was subsequently added dropwise to the mixture. The reaction was held at  $-10\text{ }^{\circ}\text{C}$  for 3 h and then allowed to warm to room temperature with stirring overnight. The mixture was poured into 300mL ice-water, and 100 mL of 1M HCl was added. Then, the resulting mixture was stirred for 30 min. The two-phase mixture was separated and the aqueous phase was washed twice with 100 mL DCM. The combined organic phases were successively washed with 1M HCl, deionized water, saturated aqueous  $\text{NaHCO}_3$  and saturated aqueous NaCl, and then dried with  $\text{MgSO}_4$ . The solution was filtered and removed solvent by rotary evaporation. The resulted yellow solid was purified by column chromatography and then recrystallized from dioxane to give crystals of TFPA.  $^1\text{H}$  NMR (400 MHz,  $\text{CDCl}_3$ ):  $\delta$  (ppm) 10.02 (s, 1H), 7.91 (d, 2H), 7.67 (d, 2H), 2.27 (s, 3H). FTIR (KBr,  $\text{cm}^{-1}$ ): 2928, 2852, 1700, 1600, 1162, 845, 756.

**Synthesis of Tetrakis(4-nitrophenyl)methane (TNPM).** Tetraphenylmethane (7.4 g, 23.09 mmol) was added into fuming nitric acid (40 ml) at  $-40\text{ }^{\circ}\text{C}$  under vigorous stirring. Then, acetic

anhydride (12.5 ml) and acetic acid (25 ml) were slowly added and stirred for 1 h. After filtration, the resulted yellow solid was recrystallized with THF to give yellow crystals. Yield: 65 %. M.p.: 339 °C; <sup>1</sup>H NMR (400 MHz, CDCl<sub>3</sub>): δ (ppm) 8.22-8.25 (d, 8H, Ar-H), 7.60-7.62 (d, 8H, Ar-H); FTIR (KBr, cm<sup>-1</sup>): 3070, 3100, 1605, 1591, 1519, 1493, 1347, 840, 757, 744, 711.

**Synthesis of Tetrakis(4-aminophenyl)methane (TAPM).** TAPM was prepared in reference to the procedure.<sup>2</sup> In a hydrogenator, dry tetrahydrofuran (40 mL), TNPM (1.6 g, 3.19 mmol) and catalysis amount of Pd/C was added and purged with nitrogen. Then, the mixture was stirred under 1.2 MPa hydrogen pressure at room temperature for 3 days. After removing the Pd/C powder and solvent, the white product was purified by recrystallization. Yield: 95 %. M.p.: 262 °C; <sup>1</sup>H NMR (400 MHz, DMSO-d<sub>6</sub>): δ (ppm) 6.66-6.68 (d, 8H, Ar-H), 6.38-6.40 (d, 8H, Ar-H), 4.85 (s, 8H, -NH<sub>2</sub>); FTIR (KBr, cm<sup>-1</sup>): 3442, 3400, 3363, 3333, 3027, 3100, 1620, 1508, 1281, 1216, 1184, 820, 754, 577; HRMS calculated for C<sub>25</sub>H<sub>24</sub>N<sub>4</sub> 380.2001, found 380.2004.

**Synthesis of tris(4-aminophenyl)amine (TAPA).** TAPA was prepared by a similar procedure to TAPM except that the precursor compound is tris(4-nitrophenyl)amine instead of tetrakis(4-nitrophenyl)methane. Yield: 90%. M.p.: 241 °C; <sup>1</sup>H NMR (400 MHz, DMSO-d<sub>6</sub>): δ (ppm) 6.60-6.62 (d, 6H, Ar-H), 6.46-6.44 (d, 6H, Ar-H), 4.68 (s, 6H, -NH<sub>2</sub>); FTIR (KBr, cm<sup>-1</sup>): 3411, 3340, 3029, 1622, 1504, 1262.

**Synthesis of 1,3,5-Tris(4-nitrophenyl)benzene (TNPB).** TNPB was prepared according to the literature. 4-Nitroacetophenone (25.1 g, 0.15 mol) and anhydrous ethanol (43.7 mL, 0.75 mmol) were charged in three-necked flask equipped with a magnetic stirrer. Thionyl chloride (18.2 ml, 0.25 mol) was added dropwise. Then the mixture was reacted at the refluxing temperature for additional 1 h. The solid was neutralized and washed successively with

deionized water, ethyl ether, and ethanol. The crude product was recrystallized with DMF to give yellow needle-like solid. Yield: 77%. M.p.: 325 °C; <sup>1</sup>H NMR (400 MHz, DMSO-d<sub>6</sub>): δ (ppm) 8.38-8.36 (d, 6H, Ar-H), 8.27-8.29 (6H, Ar-H), 8.26 (3H, Ar-H). FTIR (KBr, cm<sup>-1</sup>): 1594, 1511, 1349, 862, 843, 629.

**Synthesis of 1,3,5-Tris(4-aminophenyl)benzene (TAPB).** TAPB was prepared by a similar procedure to TAPM. Yield 95%. M.p.: 262 °C; <sup>1</sup>H NMR(400 MHz, acetone-d<sub>6</sub>): δ (ppm) 7.59 (s, 3H, Ar-H), 7.51-7.53 (d, 6H, Ar-H), 6.77-6.79 (d, 6H, Ar-H), 4.76 (6H, -NH<sub>2</sub>); <sup>13</sup>C NMR (100 MHz, acetone-d<sub>6</sub>): d (ppm) 149.0, 143.1, 130.7, 128.9, 122.3, 115.5; FTIR (KBr, cm<sup>-1</sup>): 3442, 3360, 1620, 1593, 1516, 1283, 827.

- (1) a) Wei, Q.; Lazzeri, A.; Cuia, F. D.; Scalari, M.; Galoppini, E. *Macromol. Chem. Phys.* **2004**, 205, 2089; b) Duncan, N. C.; Hay, B. P.; Hagaman, E. W.; Custelcean, R. *Tetrahedron* **2012**, 68, 53.
- (2) Li, G. Y.; Wang, Z. G. *Macromolecules* **2013**, 46, 3058.

**Table S1** Elemental analysis data of the poly(Schiff base) networks.

| Materials | Theoretical value |      |      | Measured value |      |      |
|-----------|-------------------|------|------|----------------|------|------|
|           | C                 | H    | N    | C              | H    | N    |
| PSN-DA    | 85.68             | 6.33 | 7.99 | 83.21          | 6.18 | 7.54 |
| PSN-TAPB  | 88.01             | 6.12 | 5.87 | 82.69          | 5.52 | 5.69 |
| PSN-TAPA  | 85.41             | 6.01 | 8.58 | 80.16          | 5.45 | 8.37 |
| PSN-TAPM  | 87.26             | 6.28 | 6.46 | 82.86          | 5.68 | 5.62 |

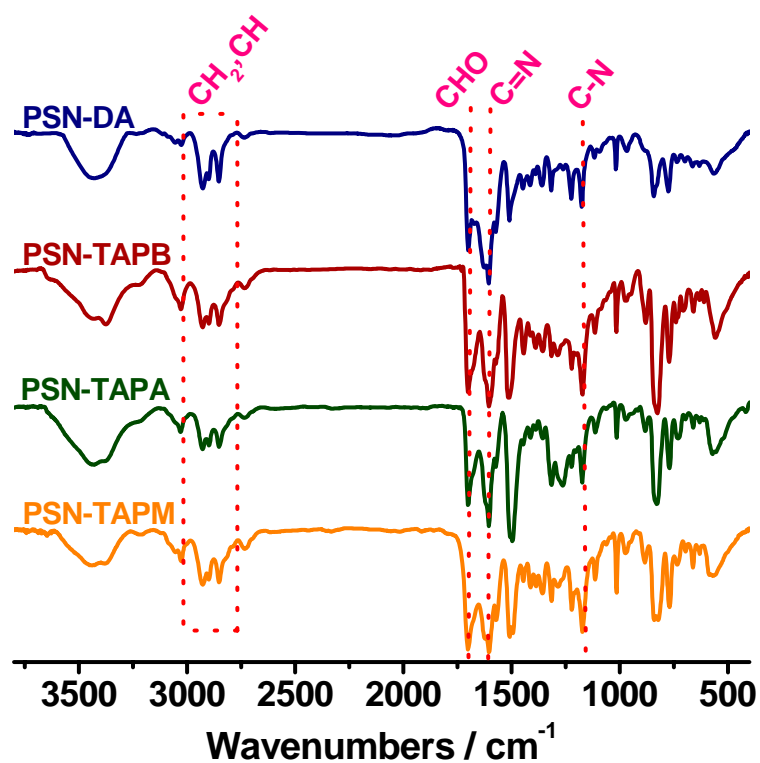

Fig. S1. FTIR spectra of the microporous poly(Schiff base) networks.

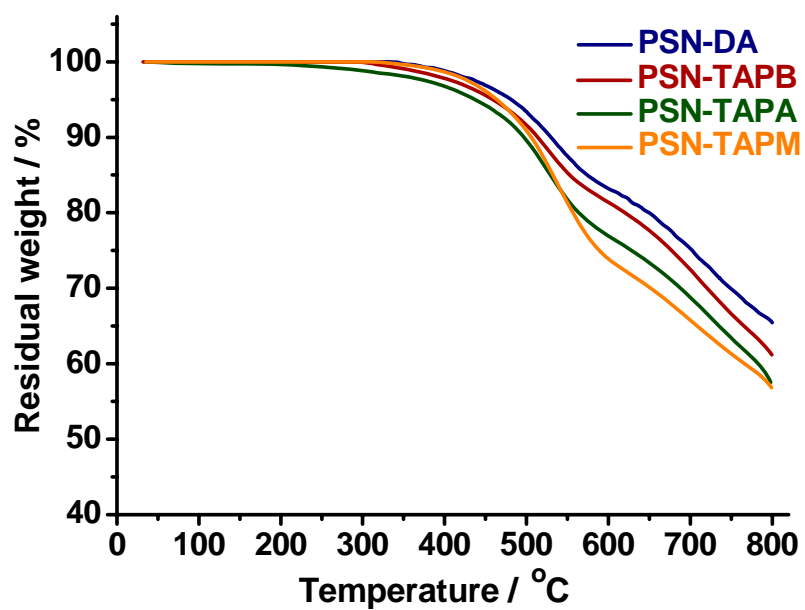

Fig. S2. TG curves of the four poly(Schiff base)s.

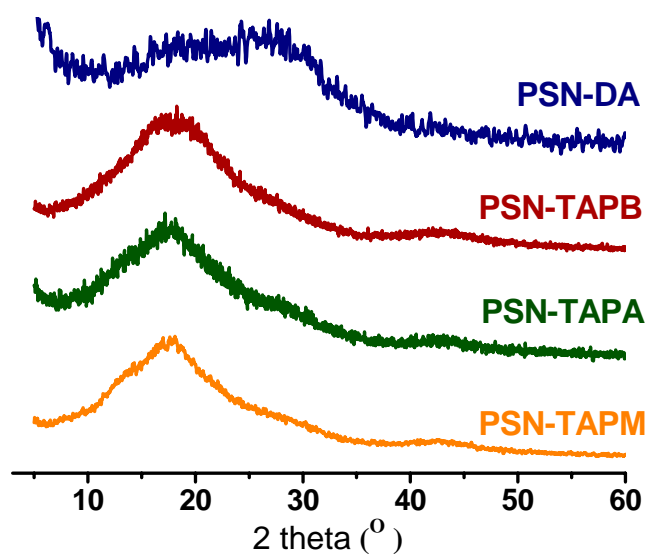

**Fig. S3.** Wide angle X-ray diffractions of the four microporous poly(Schiff base)s.

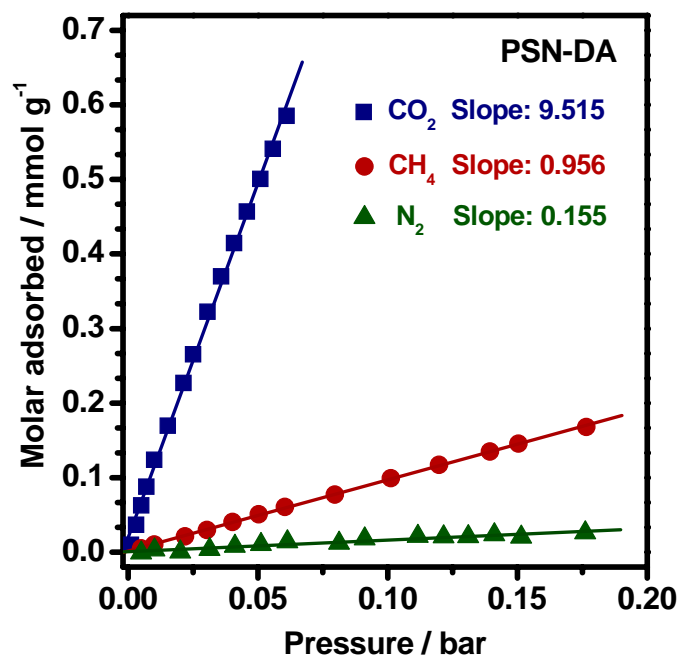

**Fig. S4.** Adsorption selectivities of CO<sub>2</sub> over CH<sub>4</sub> and N<sub>2</sub> for PSN-DA from initial slope calculations according to CO<sub>2</sub> (blue), CH<sub>4</sub> (red) and N<sub>2</sub> (green) isotherms collected at 273 K.

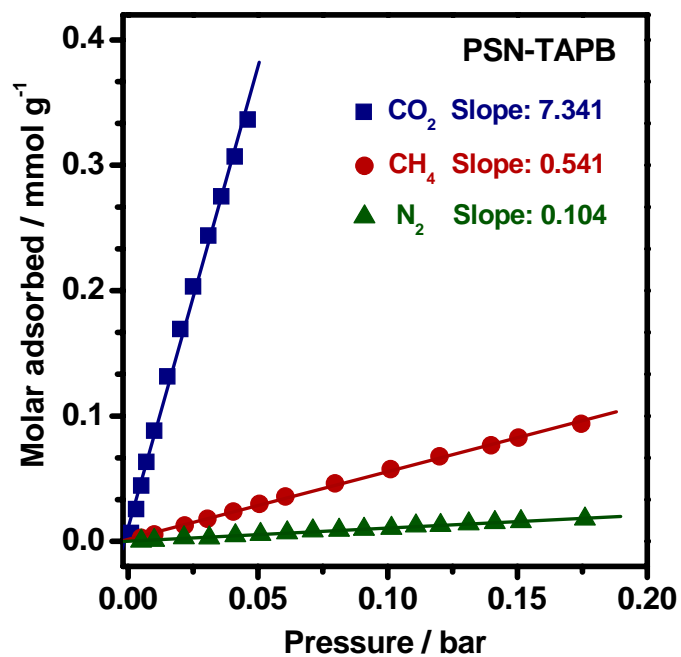

**Fig. S5.** Adsorption selectivity of CO<sub>2</sub> over CH<sub>4</sub> and N<sub>2</sub> for PSN-TAPB from initial slope calculations according to CO<sub>2</sub> (blue), CH<sub>4</sub> (red) and N<sub>2</sub> (green) isotherms collected at 273 K.

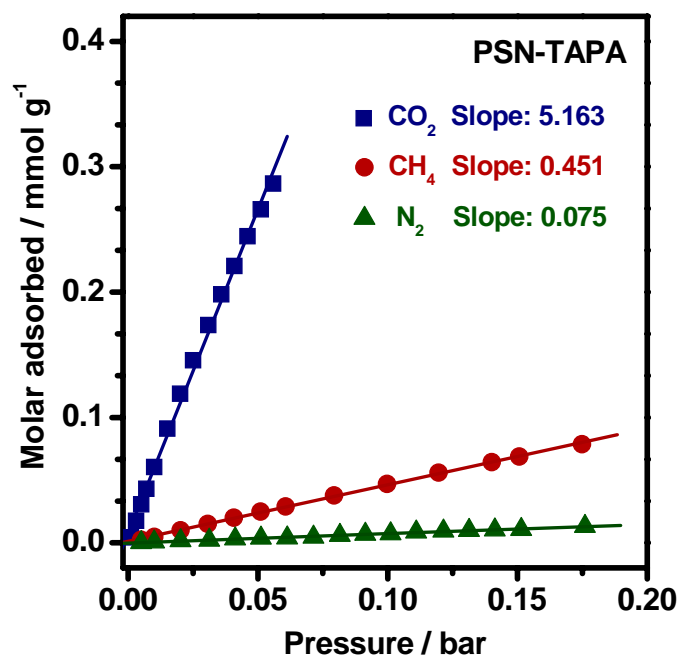

**Fig. S6.** Adsorption selectivities of CO<sub>2</sub> over CH<sub>4</sub> and N<sub>2</sub> for PSN-TAPA from initial slope calculations according to CO<sub>2</sub> (blue), CH<sub>4</sub> (red) and N<sub>2</sub> (green) isotherms collected at 273 K.

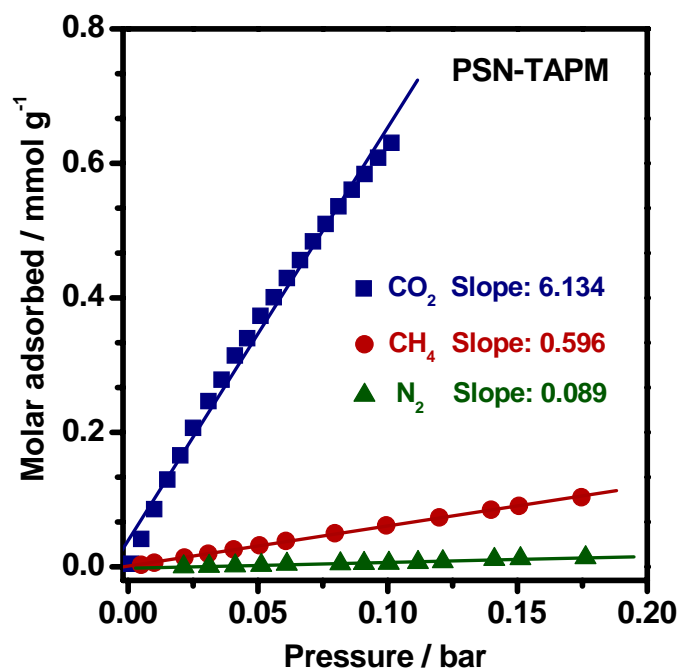

**Fig. S7.** Adsorption selectivities of CO<sub>2</sub> over CH<sub>4</sub> and N<sub>2</sub> for PSN-TAPM from initial slope calculations according to CO<sub>2</sub> (blue), CH<sub>4</sub> (red) and N<sub>2</sub> (green) isotherms were collected at 273 K.

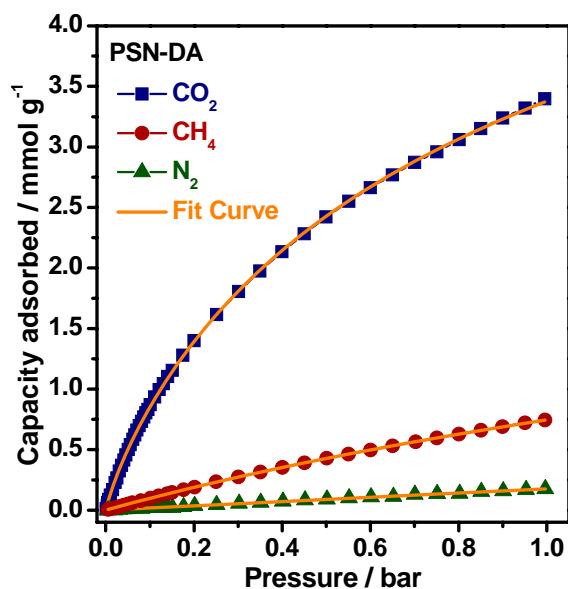

**Fig. S8.** PSN-DA Experimental pure component curves for CO<sub>2</sub>, CH<sub>4</sub> and N<sub>2</sub> at 273K, and the corresponding solid curves are the single-site Langmuir-Freundlich fits for CO<sub>2</sub>, CH<sub>4</sub> and N<sub>2</sub>.



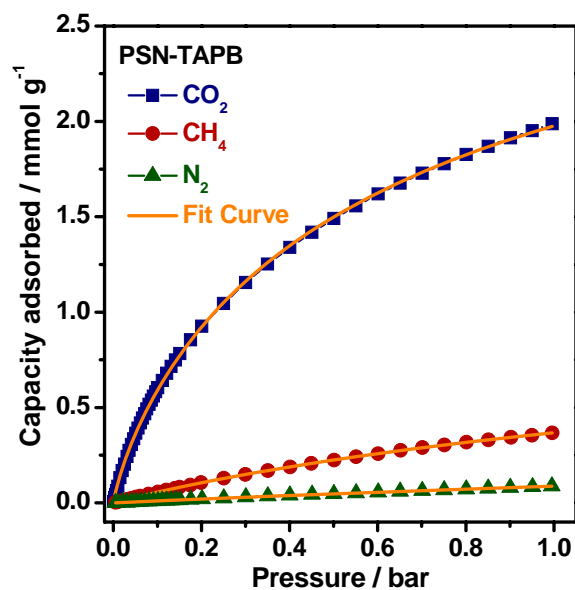

**Fig. S9.** PSN-TAPB Experimental pure component curves for CO<sub>2</sub>, CH<sub>4</sub> and N<sub>2</sub> at 273K, and the corresponding solid curves are the single-site Langmuir-Freundlich fits for CO<sub>2</sub>, CH<sub>4</sub> and N<sub>2</sub>.

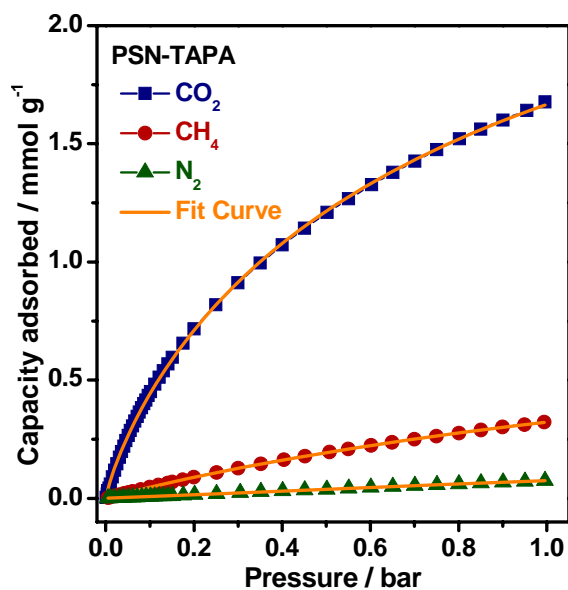

**Fig. S10.** PSN-TAPA Experimental pure component curves for CO<sub>2</sub>, CH<sub>4</sub> and N<sub>2</sub> at 273K, and the corresponding solid curves are the single-site Langmuir-Freundlich fits for CO<sub>2</sub>, CH<sub>4</sub> and N<sub>2</sub>.

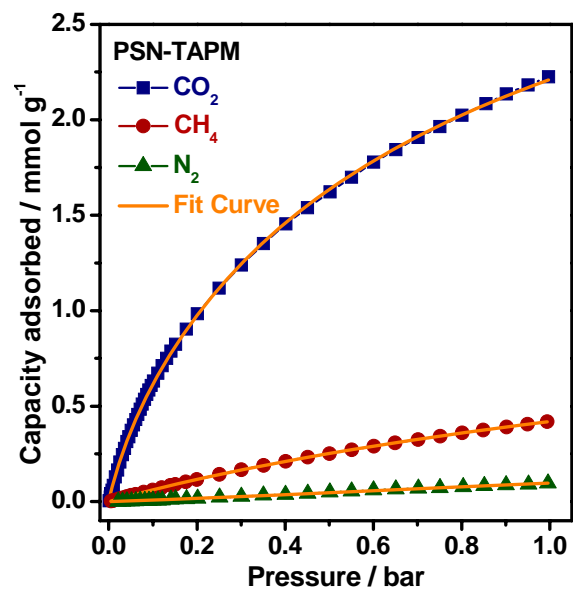

**Fig. S11.** PSN-TAPM Experimental pure component curves for CO<sub>2</sub>, CH<sub>4</sub> and N<sub>2</sub> at 273K, and the corresponding solid curves are the single-site Langmuir-Freundlich fits for CO<sub>2</sub>, CH<sub>4</sub> and N<sub>2</sub>.
